# Supplementary material for: Overexpression of SgDREB2C from Stylosanthes guianensis Leads to Increased Drought Tolerance in Transgenic Arabidopsis
Source: MDPI journal article supplement (doi:10.3390/ijms23073520), 2022-03-24
Supplement: s1 [file s1]

Table S1. Primer sequences for RT-qPCR.

| Gene            | Forward primer 5'-3'    | Reverse primer 5'-3'     |
|-----------------|-------------------------|--------------------------|
| <i>AtAPX1</i>   | ATCTCTTATGCGGACTTA      | GCTACAACATCAACTCTC       |
| <i>AtAPX2</i>   | CAACTACCAACCGACAAG      | GAAGAAGGCATCCTCATC       |
| <i>AtAPX</i>    | GCTACTAAATCTTCATCTTCAG  | ATGCCAACCTAATCTAACC      |
| <i>AtCAT1</i>   | TTCCCTGACATGGTCCATGC    | GCCTTCCATGTGCCTGTAGT     |
| <i>AtCAT2</i>   | GCCGATACTCAGAGACACCG    | CTCAGCATGACGAACCTGGT     |
| <i>AtCAT3</i>   | ACATGGAGGGTTTCGGTGTC    | TTAGTGGCGTGGCTGTGATT     |
| <i>AtSOD1</i>   | ACAGCAGTGAGGGTGTTACG    | GGTGTCAACCAAGAGCATGGA    |
| <i>AtCOR15A</i> | ATGGCGATGTCTTTATCAGGAGC | TGACGGTACCAACACCACTCTG   |
| <i>AtCOR47</i>  | CAACAGCTCTTCTTCCTCTTCG  | CCTTTCTTATCTTCCTCTCCTTCA |
| <i>AtDREB2C</i> | GAGGATTGTAGCGATGAA      | CAGCCAAGTTATGTTCTTC      |
| <i>AtKIN1</i>   | TGTCAGAGACCAACAAGAATGCC | TGTCCAGCAGAACATTGCTCTTC  |
| <i>AtRD29A</i>  | GTTACTGATCCCAACAAAGAAGA | GGAGACTCATCAGTCACTTCCA   |
| <i>SgDREB2C</i> | TTCAGACACAACACTACTATATC | AAGCAACAGAGTCATAAG       |
| <i>AtACTIN</i>  | TGTGCCAATCTACGAGGGTTT   | TTTCCCGCTCTGCTGTTGT      |
| <i>SgACTIN</i>  | GTTCTTCTCCAGCCATCT      | CCTTGCTCATACGGTCAG       |
